# Supplementary material
Source: PubMed Central journal article supplement (PMC4442499)
Supplement: JVI.03395-14_zjv999090359so6.pdf [file JVI.03395-14_zjv999090359so6.pdf]

| Segment | Position <sup>a</sup> | AIV residues | H3N2 CIV residues       | H3N8 CIV residues | Function <sup>c</sup>                  |
|---------|-----------------------|--------------|-------------------------|-------------------|----------------------------------------|
| PB2     | 76                    | T(96.5)      | M(93.6)/I(17.4)         | T(100)            | Within PB1 and NP-binding domain (1)   |
|         | 147                   | I(78)        | <b>T(100)</b>           | V(100)            | Within NP-binding domain (1)           |
|         | 365                   | M(97)        | <b>I(100)</b>           | M(100)            | Within cap binding domain (2)          |
|         | 570                   | M(94)        | <b>V(100)</b>           | M(100)            | Within PB1 and NP-binding domain (1)   |
| PB1     | 108                   | L(96)        | <b>I(100)</b>           | L(100)            | Within RNA binding domain (3)          |
|         | 361                   | S(94)        | <b>N(100)</b>           | S(100)            | Virulence marker (4)                   |
|         | 377                   | D(97)        | N(78.3)/D(21.7)         | D(100)            | Within RNA binding domain (3)          |
|         | 517                   | I(96)        | V(95.64)/I(4.34)        | I(100)            | Host range (5)                         |
|         | 723                   | R(97)        | Q(93.6)/R(17.4)         | R(100)            | N/A                                    |
|         | 744                   | M(94)        | <b>V(100)</b>           | M(100)            | N/A                                    |
| PA      | 65                    | S(93)        | <b>Y(100)</b>           | S(100)            | Host adaptation (6)                    |
|         | 208                   | T(93)        | <b>A(100)</b>           | T(100)            | Within translocation domain(7)         |
|         | 234                   | D(98)        | N(83.3)/D(16.7)         | D(100)d           | Within translocation domain(7)         |
|         | 347                   | D(99)        | N(29.2)/D(70.8)         | D(100)            | N/A                                    |
|         | 369                   | A(96)        | <b>V(100)</b>           | A(100)            | N/A                                    |
|         | 441                   | M(93)        | K(87.5)/R(12.5)         | M(95.1)/I(4.9)    | N/A                                    |
|         | 615                   | K(94)        | <b>R(100)</b>           | K(100)            | Polymerase activity and adaptation (8) |
| HA      | 10                    | T(95)        | <b>A(100)</b>           | T(100)            | N/A                                    |
|         | 81                    | D(74)        | <b>N(100)</b>           | Y(98.75)/H(1.25)  | Glycosylation sequon (9)               |
|         | 111                   | L(96)        | I(83.3)/V(16.7)*        | I(100)            | N/A                                    |
|         | 172                   | D(95)        | <b>N(100)</b>           | E(8.75)/K(91.25)  | N/A                                    |
|         | 222                   | W(90)        | <b>L(100)*</b>          | L(100)            | Receptor binding (10, 11)              |
|         | 435                   | H(96)        | N(91.7)/H(4.15)/K(4.15) | H(100)            | N/A                                    |
|         | 489                   | D(92)        | <b>N(100)</b>           | Y(100)            | N/A                                    |
| NP      | 52                    | Y(58)        | H(95.8)/Y(4.2)*         | H(69.8)/Y(30.2)   | N/A                                    |
|         | 109                   | I(97)        | I(62.5)/V(37.5)         | I(100)            | Host range (12)                        |
|         | 125                   | N(95)        | G(91.7)/N(8.4)          | N(100)            | N/A                                    |
|         | 159                   | M(95)        | L(91.7)/M(8.4)          | M(100)            | N/A                                    |
|         | 373                   | T(50)        | K(95.8)/T(4.2)          | T(100)            | Putative NLS (13)                      |
|         | 428                   | A(94)        | T(95.8)/A(4.2)          | A(100)            | N/A                                    |
|         | 452                   | R(79)        | K(95.8)/R(4.2)*         | K(100)            | N/A                                    |
|         | 473                   | N(93)        | K(95.8)/N(4.2)          | N(100)            | N/A                                    |
| NA      | 24                    | M(95)        | <b>L(100)</b>           | N/A               | N/A                                    |
|         | 48                    | N(80)        | S(91.7)/N(8.3)          | N/A               | N/A                                    |
|         | 54                    | E(89)        | <b>K(100)</b>           | N/A               | N/A                                    |
|         | 81                    | P(74)        | <b>S(100)</b>           | N/A               | N/A                                    |
|         | 143                   | D(62)        | <b>N(100)</b>           | N/A               | N/A                                    |
|         | 156                   | P(96)        | <b>S(100)</b>           | N/A               | N/A                                    |
|         | 372                   | S(95)        | <b>L(100)</b>           | N/A               | Sialidase activity (14)                |
|         | 432                   | R(96)        | <b>G(100)</b>           | N/A               | N/A                                    |
| NS1     | 60                    | A(87)        | <b>I(100)</b>           | A(99.46)/T(0.54)  | Within RNA-binding domain (15)         |
|         | 67                    | R(91)        | <b>W(100)</b>           | Q(100)            | Within RNA-binding domain (15)         |
|         | 75                    | E(85)        | <b>K(100)</b>           | E(100)            | Within effector domain (15)            |
|         | 152                   | E(67)        | <b>N(100)</b>           | E(99.46)/D(0.54)  | Within effector domain (15)            |
|         | 172                   | E(95)        | <b>K(100)</b>           | E(100)            | CPSF30 binding (15)                    |

Table 1. Amino acid changes that differentiate H3N2 CIV from AIVs. Fixed mutations are shown in bold. Asterisks indicate convergent mutations between H3N2 and H3N8 CIVs. <sup>a</sup> Codon position. H3 numbering is used for codon positions in HA. <sup>b</sup> Amino acid present at the consensus level. The prevalence of each amino acid is shown in brackets. <sup>c</sup> Putative function of the amino acid residue or domain in which is located.

1. **Poole E, Elton D, Medcalf L, Digard P.** 2004. Functional domains of the influenza A virus PB2 protein: identification of NP- and PB1-binding sites. *Virology* **321**:120-133.
2. **Guilligay D, Tarendeau F, Resa-Infante P, Coloma R, Crepin T, Sehr P, Lewis J, Ruigrok RW, Ortin J, Hart DJ, Cusack S.** 2008. The structural basis for cap binding by influenza virus polymerase subunit PB2. *Nature structural & molecular biology* **15**:500-506.
3. **Gonzalez S, Ortin J.** 1999. Distinct regions of influenza virus PB1 polymerase subunit recognize vRNA and cRNA templates. *The EMBO journal* **18**:3767-3775.
4. **Allen JE, Gardner SN, Vitalis EA, Slezak TR.** 2009. Conserved amino acid markers from past influenza pandemic strains. *BMC microbiology* **9**:77.
5. **Tamuri AU, Dos Reis M, Hay AJ, Goldstein RA.** 2009. Identifying changes in selective constraints: host shifts in influenza. *PLoS computational biology* **5**:e1000564.
6. **Miotto O, Heiny AT, Albrecht R, Garcia-Sastre A, Tan TW, August JT, Brusich V.** 2010. Complete-proteome mapping of human influenza A adaptive mutations: implications for human transmissibility of zoonotic strains. *PloS one* **5**:e9025.
7. **Nieto A, de la Luna S, Barcena J, Portela A, Ortin J.** 1994. Complex structure of the nuclear translocation signal of influenza virus polymerase PA subunit. *The Journal of general virology* **75 ( Pt 1)**:29-36.
8. **Gabriel G, Dauber B, Wolff T, Planz O, Klenk HD, Stech J.** 2005. The viral polymerase mediates adaptation of an avian influenza virus to a mammalian host. *Proceedings of the National Academy of Sciences of the United States of America* **102**:18590-18595.
9. **Zhang M, Gaschen B, Blay W, Foley B, Haigwood N, Kuiken C, Korber B.** 2004. Tracking global patterns of N-linked glycosylation site variation in highly variable viral glycoproteins: HIV, SIV, and HCV envelopes and influenza hemagglutinin. *Glycobiology* **14**:1229-1246.
10. **Collins PJ, Vachieri SG, Haire LF, Ogrodowicz RW, Martin SR, Walker PA, Xiong X, Gamblin SJ, Skehel JJ.** 2014. Recent evolution of equine influenza and the origin of canine influenza. *Proceedings of the National Academy of Sciences of the United States of America* **111**:11175-11180.
11. **Yang G, Li S, Blackmon S, Ye J, Bradley KC, Cooley J, Smith D, Hanson L, Cardona C, Steinhauer DA, Webby R, Liao M, Wan XF.** 2013. Mutation tryptophan to leucine at position 222 of haemagglutinin could facilitate H3N2 influenza A virus infection in dogs. *The Journal of general virology* **94**:2599-2608.
12. **Chen GW, Chang SC, Mok CK, Lo YL, Kung YN, Huang JH, Shih YH, Wang JY, Chiang C, Chen CJ, Shih SR.** 2006. Genomic

- signatures of human versus avian influenza A viruses. *Emerging infectious diseases* **12**:1353-1360.
13. **Hutchinson EC, Fodor E.** 2012. Nuclear import of the influenza A virus transcriptional machinery. *Vaccine* **30**:7353-7358.
  14. **Kobasa D, Kodihalli S, Luo M, Castrucci MR, Donatelli I, Suzuki Y, Suzuki T, Kawaoka Y.** 1999. Amino acid residues contributing to the substrate specificity of the influenza A virus neuraminidase. *Journal of virology* **73**:6743-6751.
  15. **Hale BG, Randall RE, Ortin J, Jackson D.** 2008. The multifunctional NS1 protein of influenza A viruses. *The Journal of general virology* **89**:2359-2376.
