# Supplementary material
Source: PubMed Central journal article supplement (PMC4442499)
Supplement: JVI.03395-14_zjv999090359so7.pdf [file JVI.03395-14_zjv999090359so7.pdf]

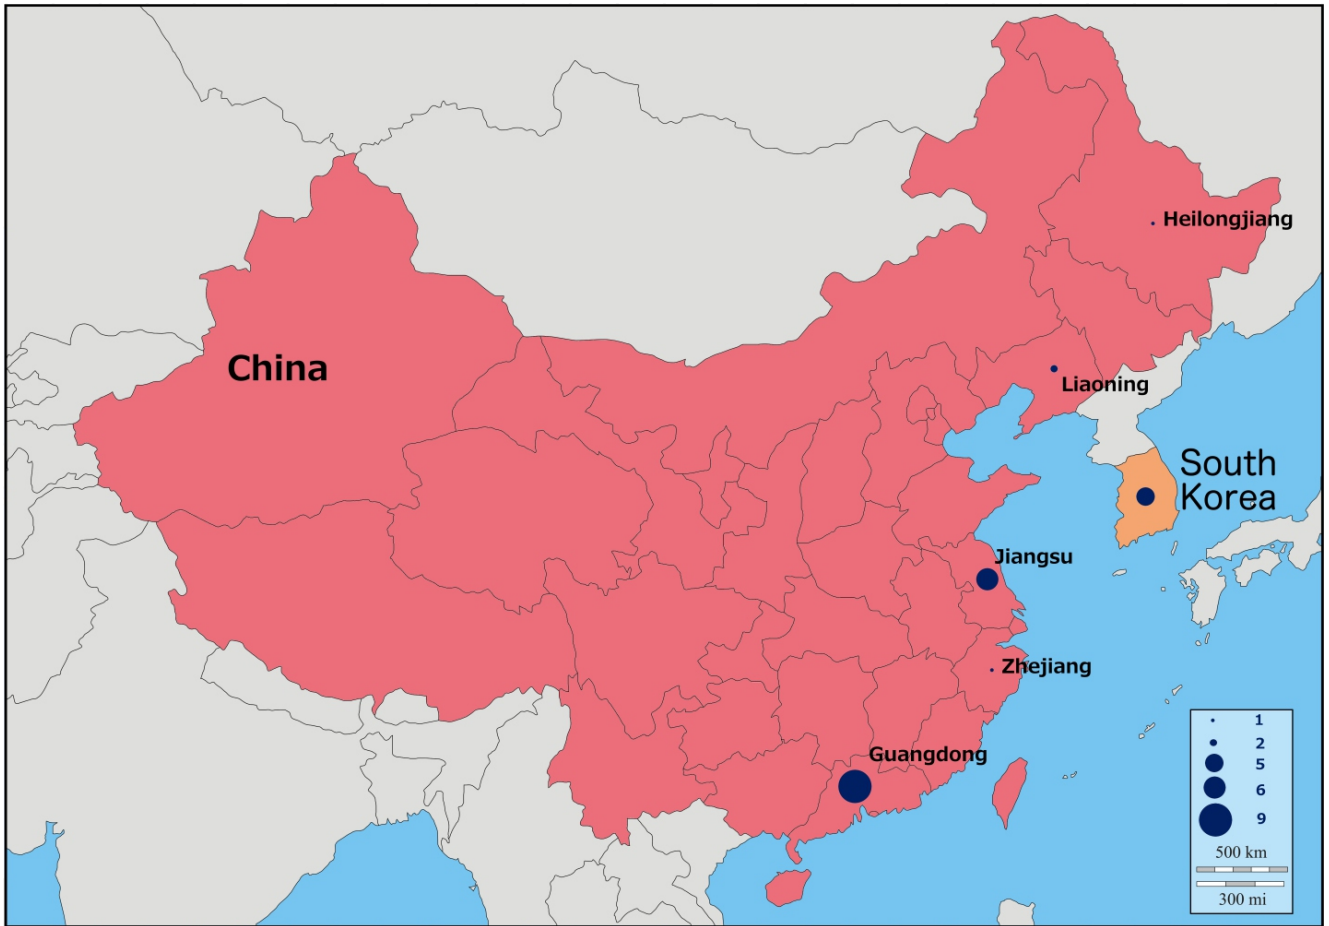

**Figure S1.** Geographical locations of CIV isolates.

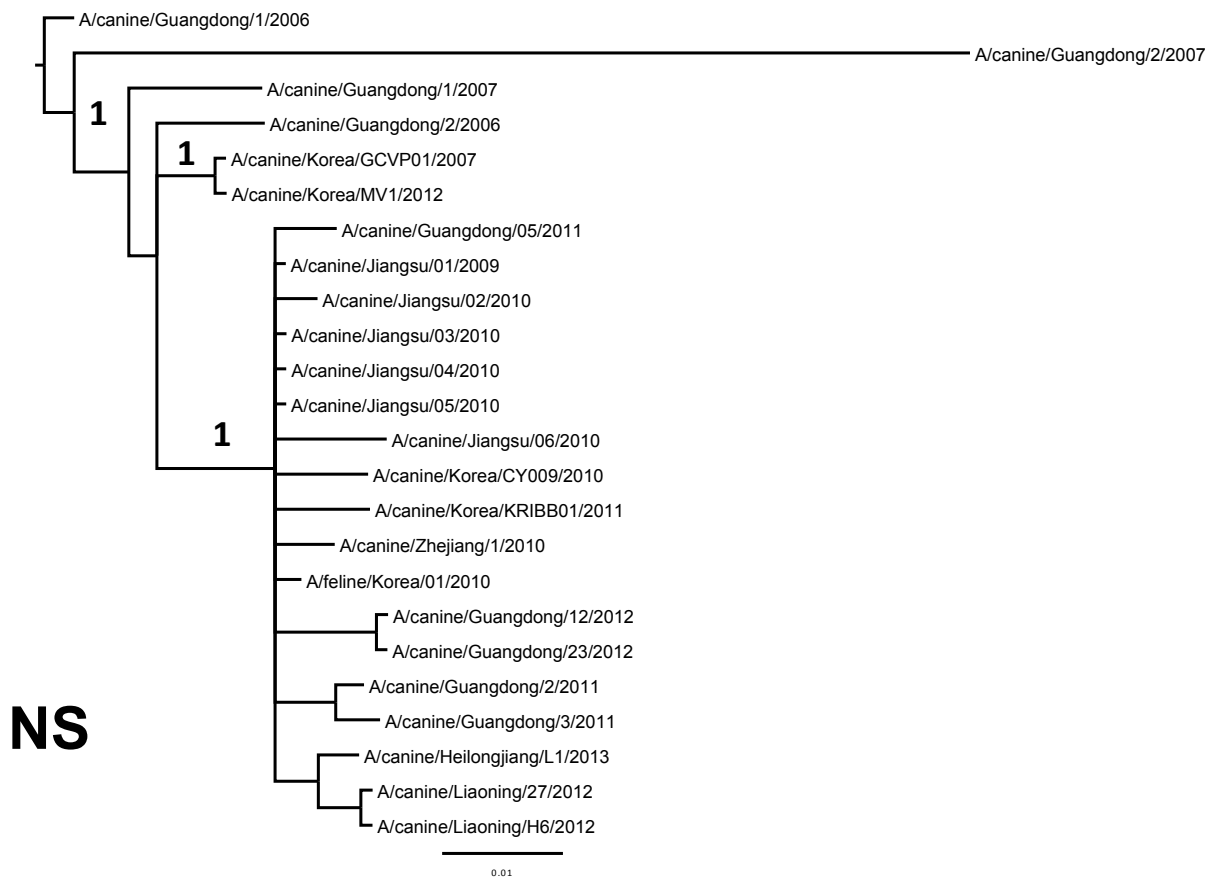

**NS**

**Figure S2.** Phylogenetic tree of 24 NS sequences derived from H3N2 CIVs collected between 2006 and 2013. The tree was inferred using MrBayes. Posterior probability values  $\geq 0.95$  are shown.

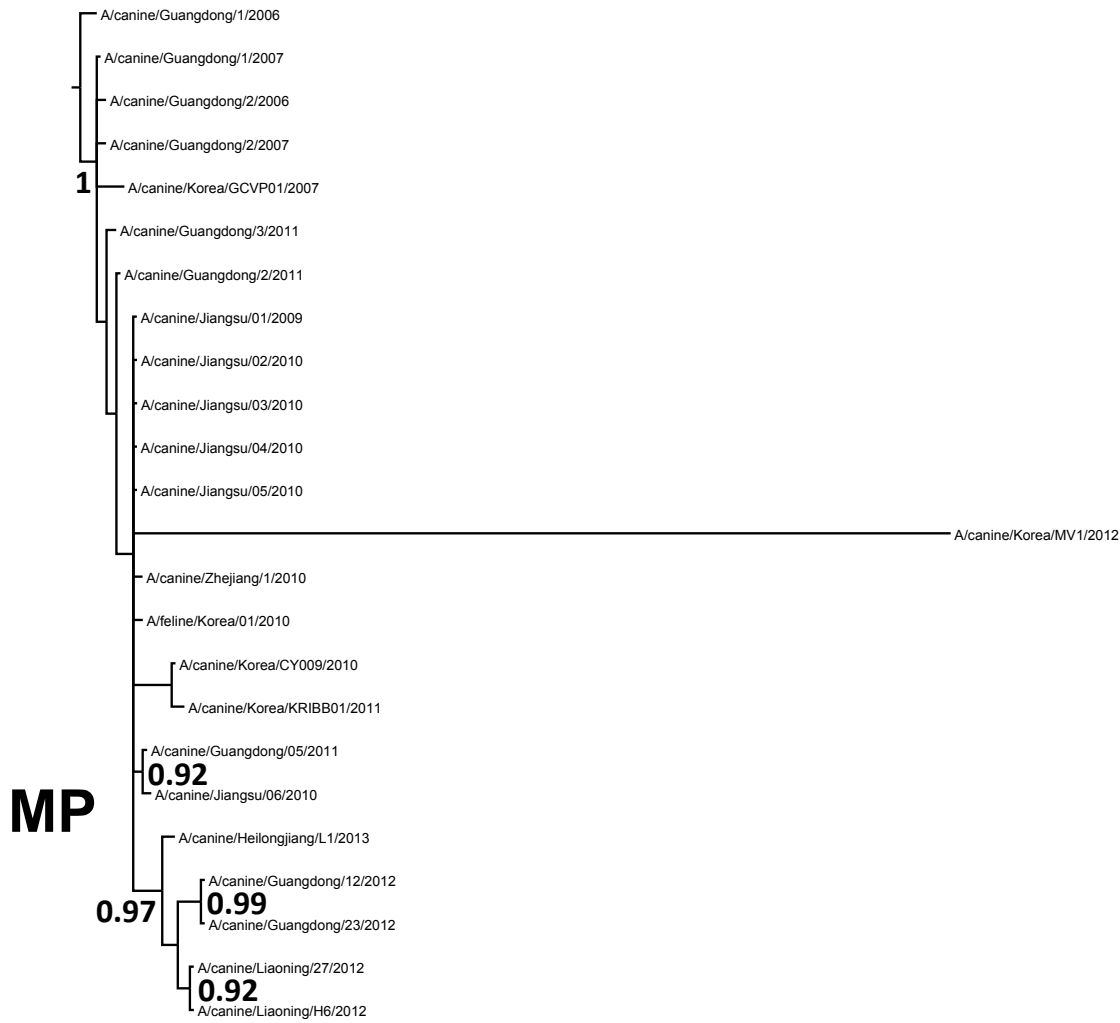

**Figure S3.** Phylogenetic tree of 24 MP sequences derived from H3N2 CIVs collected between 2006 and 2013. The tree was inferred using MrBayes. Posterior probability values  $\geq 0.95$  are shown.
